# Supplementary material
Source: publisher site journal article supplement (https://static.cambridge.org/content/id/urn:cambridge.org:id:article:S003382221900033X/resource/name/S003382221900033Xsupp001.pdf)

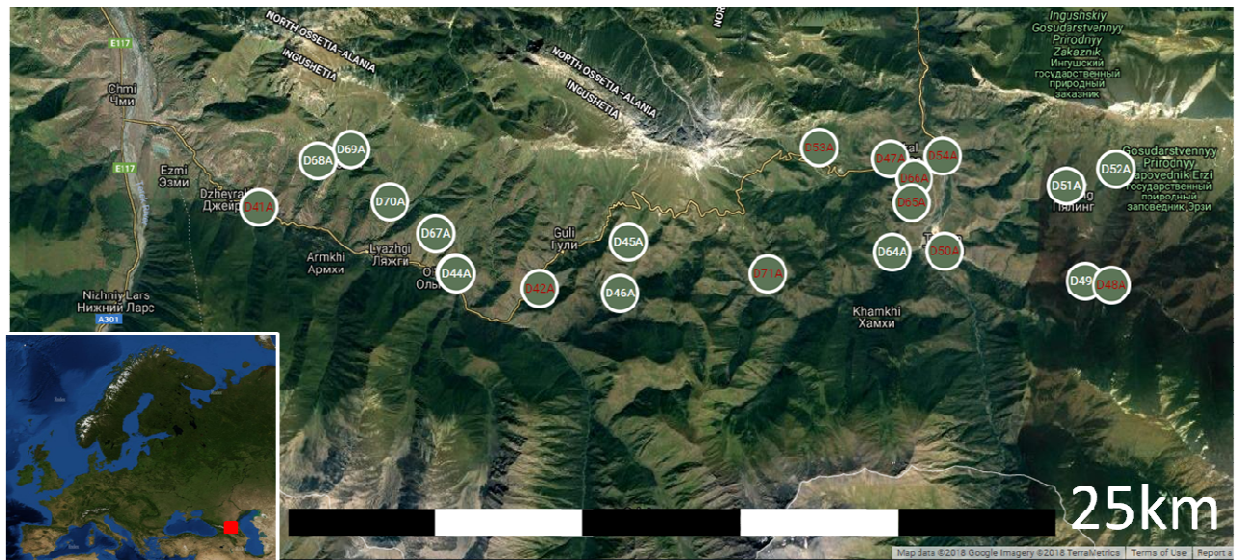

**Figure S1.** Map of the study region in the Northern Caucasus, Russia and its location on the map of Europe (inset). 22 locations where buildings were sampled are shown with circles, 10 selected locations denoted with red font.

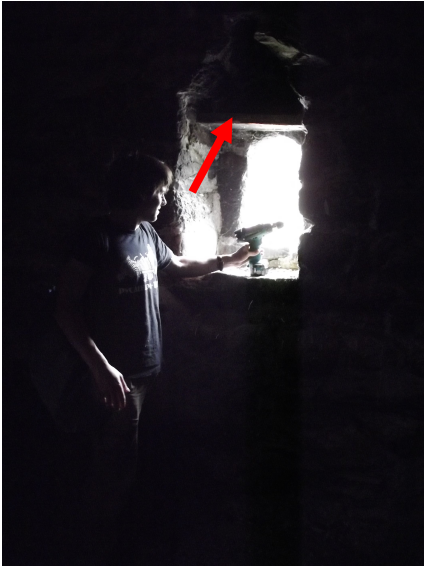

D41A 7 (Samples ##26, 27)

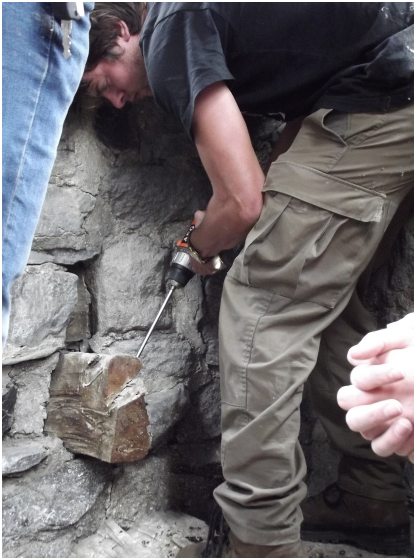

D41A 2 (Sample #1 LSC)

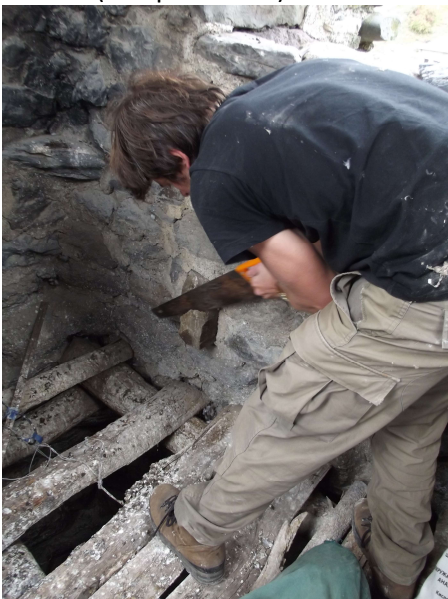

D41A 4 (Sample #2 LSC)

**Figure S2.** Location of the sampled timber.

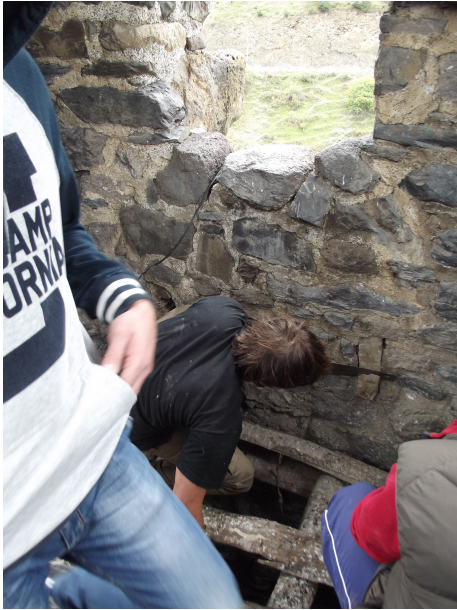

D41A 5 (Sample #3 LSC)

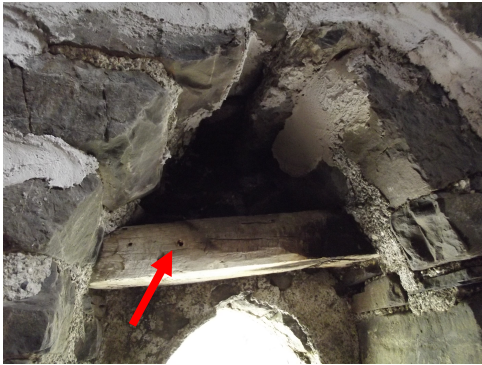

D42A 10 (Samples ##9, 10, 18)

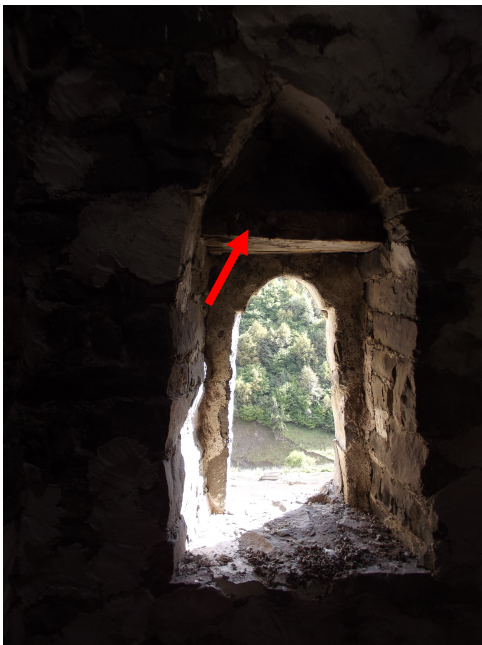

D42A 11 (Sample #28)

**Figure S2 (continued).**

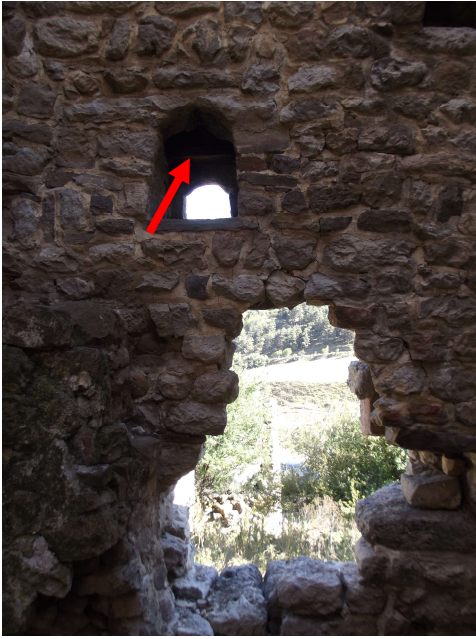

D47A 8 (Sample #29)

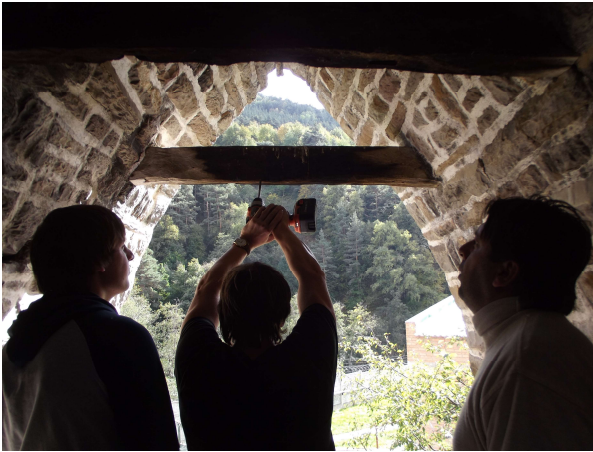

D48A 3 (Samples ##30, 31)

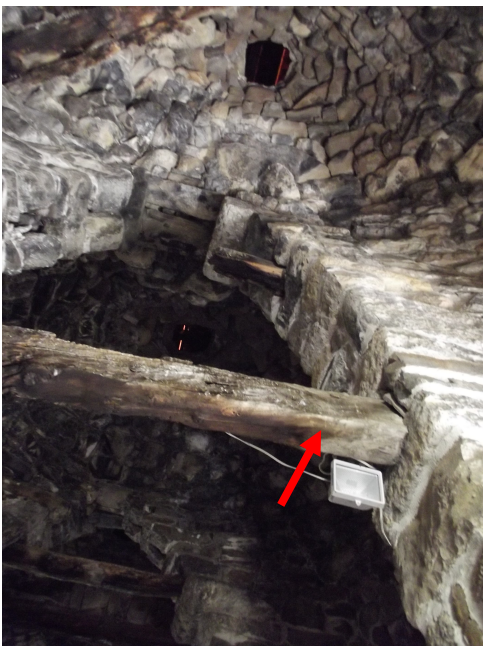

D50A 3 (Samples ##11, 12)  
**Figure S2 (continued).**

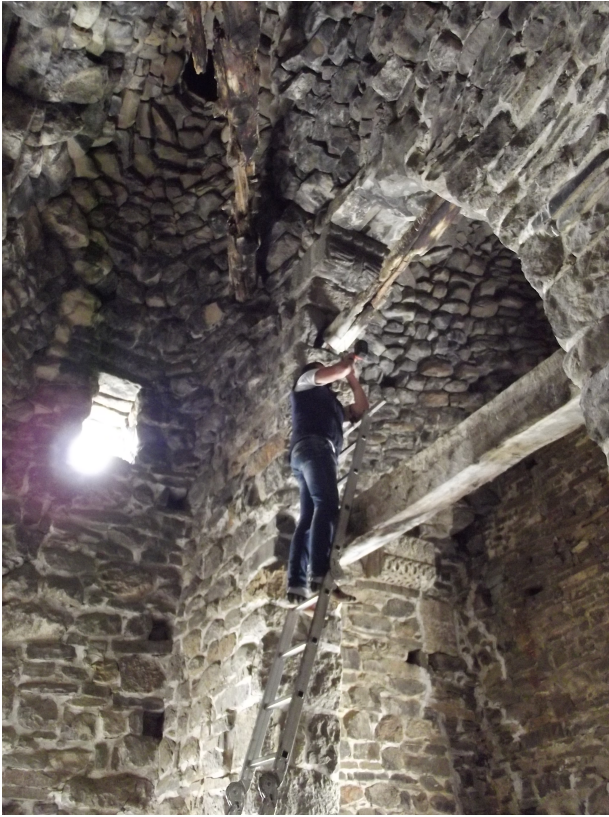

D50A 6 (Sample #13)

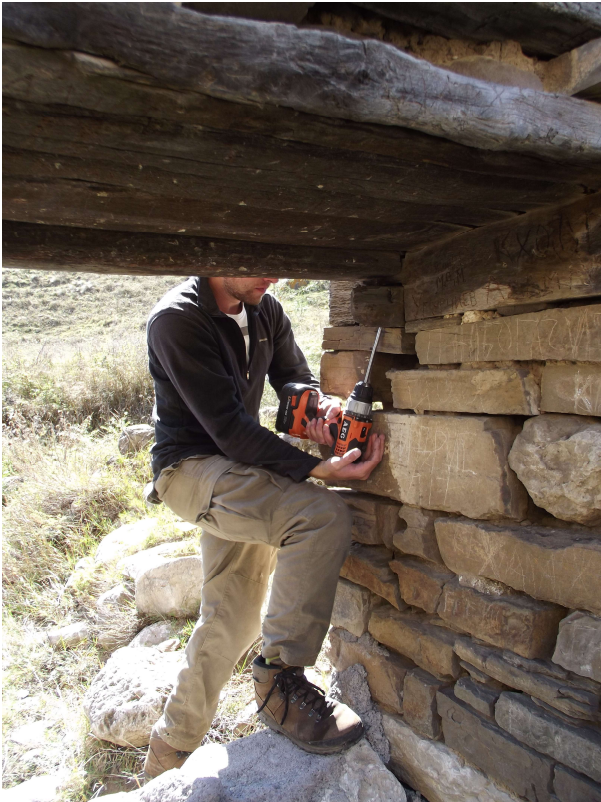

D54A 4 (Sample #14)  
Figure S2 (continued).

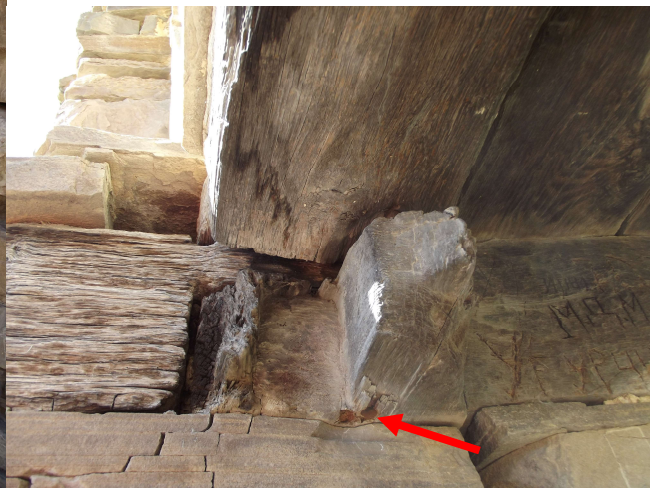

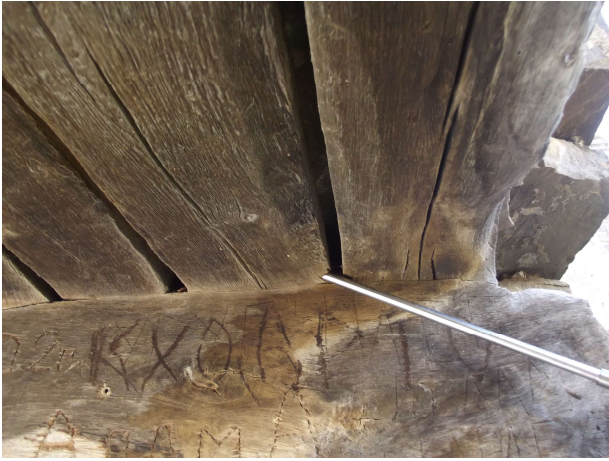

D54A 2 (Samples ##15, 17)

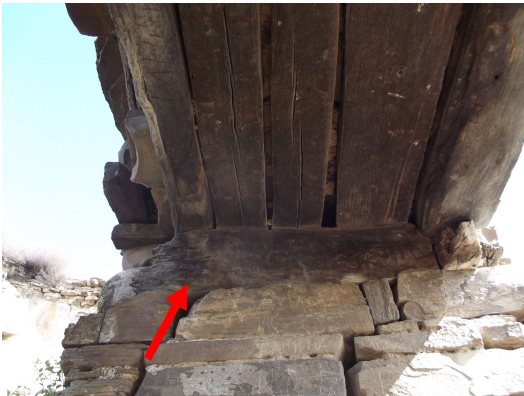

D54A 7 (Samples ##16, 32)

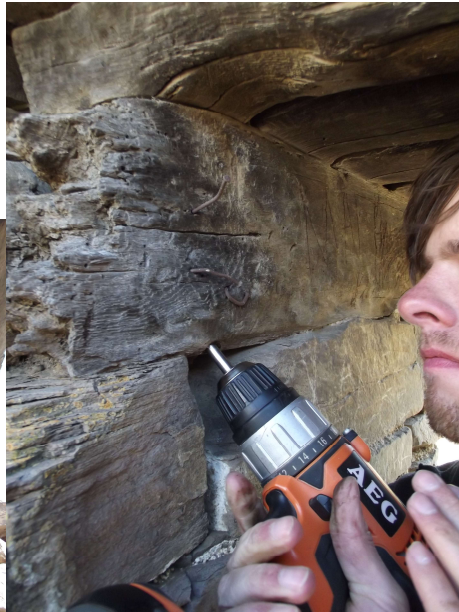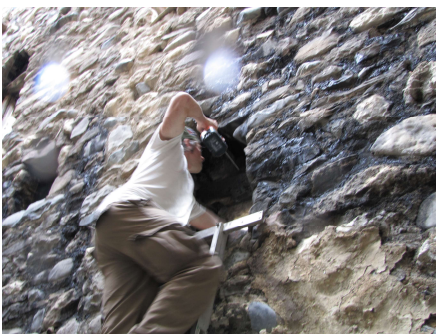

D65A 9 (Samples ##33, 34)  
Figure S2 (*continued*).

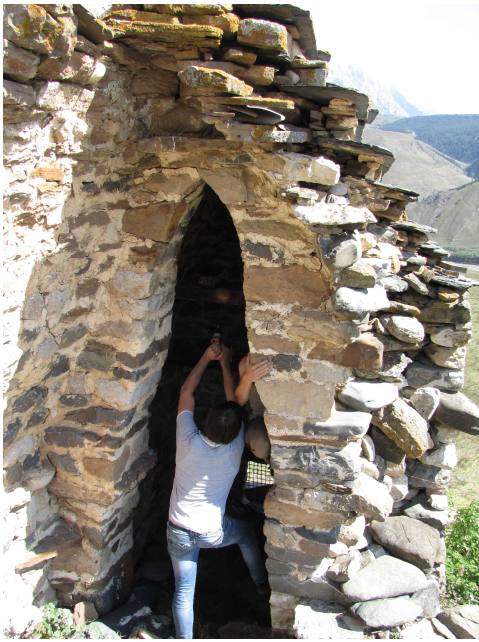

D66A 5 (Samples ##21, 22)

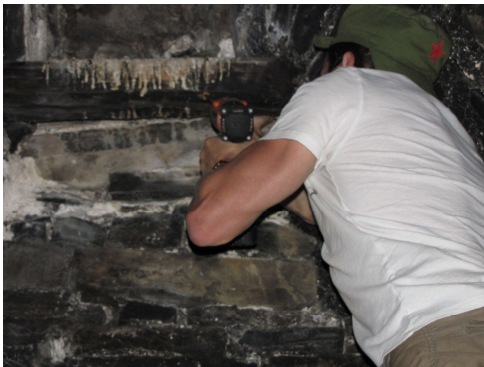

D71A 5 (Samples ##23, 24)

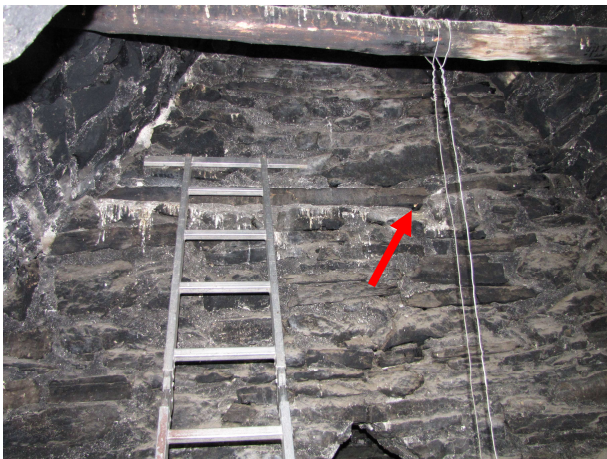

D71A 7 (Sample #25)  
**Figure S2 (continued).**

Figure S3. Results of wiggle-matching, table view and multiple plot view from OxCal program.

a) D41A Turov Tower

| Name                                               | Unmodelled (BC/AD) |      |      |       |          |      | Modelled (BC/AD) |      |      |       |          |      | Indices           |       |   |   | Select | Page break                            |                          |
|----------------------------------------------------|--------------------|------|------|-------|----------|------|------------------|------|------|-------|----------|------|-------------------|-------|---|---|--------|---------------------------------------|--------------------------|
|                                                    | from               | to   | %    | $\mu$ | $\sigma$ | m    | from             | to   | %    | $\mu$ | $\sigma$ | m    | A <sub>comb</sub> | A     | L | P |        |                                       | C                        |
| ▼ D41A Turov Tower                                 | 1641               | 1669 | 95.4 | 1654  | 14       | 1656 |                  |      |      |       |          |      | 121               |       |   |   |        | <input checked="" type="checkbox"/> 2 | <input type="checkbox"/> |
| #26 (350,20)                                       | 1462               | 1635 | 95.4 | 1551  | 52       | 1561 | 1597             | 1625 | 95.4 | 1610  | 14       | 1612 |                   | 117.3 |   |   |        | <input checked="" type="checkbox"/> 3 | <input type="checkbox"/> |
| #27 (240,20)                                       | 1641               | 1948 | 95.4 | 1700  | 72       | 1660 | 1641             | 1669 | 95.4 | 1654  | 14       | 1656 |                   | 111.6 |   |   |        | <input checked="" type="checkbox"/> 4 | <input type="checkbox"/> |
| Warning! Date may extend out of range - 240+/-20BP |                    |      |      |       |          |      |                  |      |      |       |          |      |                   |       |   |   |        |                                       |                          |

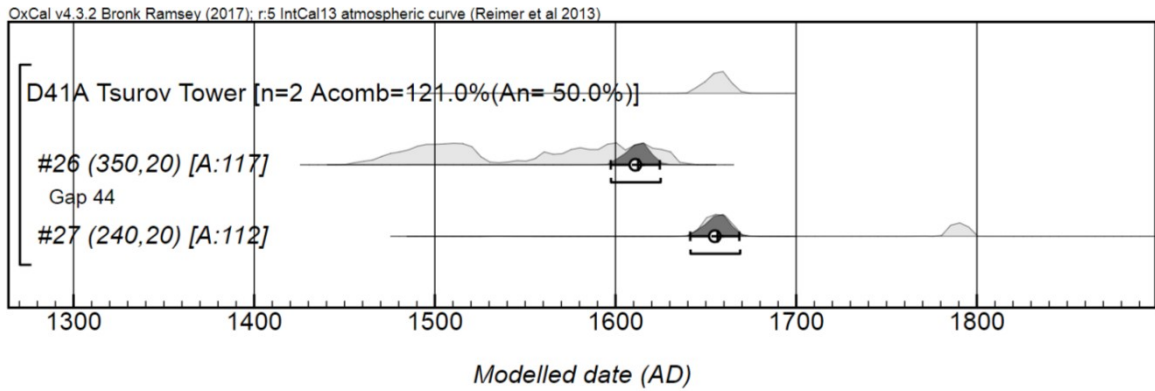



Figure S3 (continued).  
b) D42A Byalgan Tower

| Name                       | Unmodelled (BC/AD)                                                                                                                              |      |      |       |          |      | Modelled (BC/AD)                                                                                                                                                      |    |   |       |          |   | Indices           |   |   |   | Select                                | Page break               |
|----------------------------|-------------------------------------------------------------------------------------------------------------------------------------------------|------|------|-------|----------|------|-----------------------------------------------------------------------------------------------------------------------------------------------------------------------|----|---|-------|----------|---|-------------------|---|---|---|---------------------------------------|--------------------------|
|                            | from                                                                                                                                            | to   | %    | $\mu$ | $\sigma$ | m    | from                                                                                                                                                                  | to | % | $\mu$ | $\sigma$ | m | A <sub>comb</sub> | A | L | P |                                       |                          |
| Show all<br>Show structure | Warning! ZERO distribution                                                                                                                      |      |      |       |          |      |                                                                                                                                                                       |    |   |       |          |   |                   |   |   |   | All Visible                           |                          |
| ▼ D42A Byalgan             | Warning! Not calculating range - D42A Byalgan<br>Warning! Not calculating range - D42A Byalgan<br>Warning! Not calculating range - D42A Byalgan |      |      |       |          |      |                                                                                                                                                                       |    |   |       |          |   |                   |   |   |   | <input checked="" type="checkbox"/> 2 | <input type="checkbox"/> |
| #9 (977,23)                | 1015                                                                                                                                            | 1154 | 95.4 | 1073  | 44       | 1069 | Warning! Not calculating range - #9<br>Warning! Not calculating range - #9<br>Warning! Not calculating range - #9<br>Warning! Poor agreement - A= 0.0%(A'c= 60.0%)    |    |   |       |          |   |                   |   |   |   | <input checked="" type="checkbox"/> 3 | <input type="checkbox"/> |
| #18 (519,22)               | 1331                                                                                                                                            | 1440 | 95.4 | 1415  | 20       | 1419 | Warning! Not calculating range - #18<br>Warning! Not calculating range - #18<br>Warning! Not calculating range - #18<br>Warning! Poor agreement - A= 0.0%(A'c= 60.0%) |    |   |       |          |   |                   |   |   |   | <input checked="" type="checkbox"/> 4 | <input type="checkbox"/> |
| #10 (566,24)               | 1311                                                                                                                                            | 1421 | 95.4 | 1364  | 35       | 1350 | Warning! Not calculating range - #10<br>Warning! Not calculating range - #10<br>Warning! Not calculating range - #10<br>Warning! Poor agreement - A= 0.0%(A'c= 60.0%) |    |   |       |          |   |                   |   |   |   | <input checked="" type="checkbox"/> 5 | <input type="checkbox"/> |

OxCal v4.3.2 Bronk Ramsey (2017); r5 IntCal13 atmospheric curve (Reimer et al 2013)

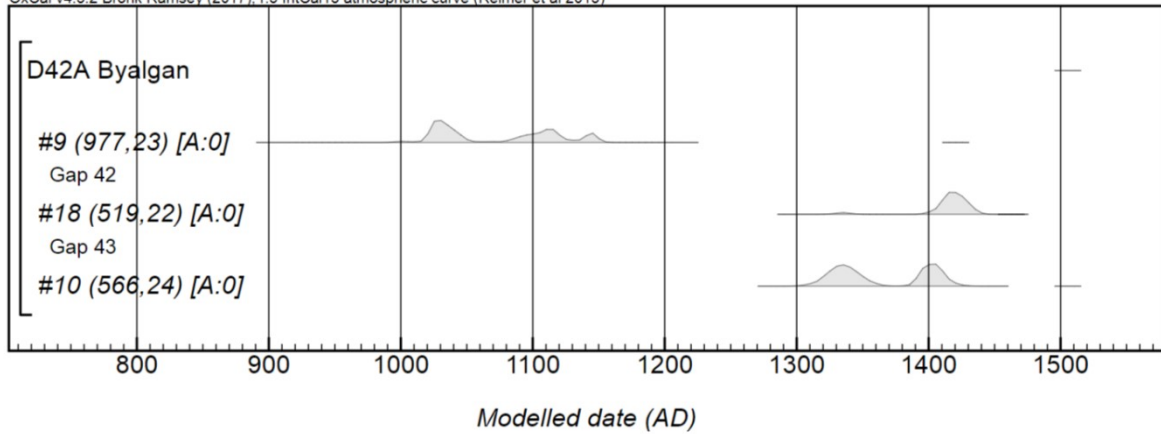

Figure S3 (continued).  
d) D48A Myashkhi crypt

| Name                                                                                                                                        | Unmodelled (BC/AD) |      |      |       |          |      | Modelled (BC/AD)                               |     |      |       |          |      | Indices           |       |   |   | Select | Page break                            |                          |
|---------------------------------------------------------------------------------------------------------------------------------------------|--------------------|------|------|-------|----------|------|------------------------------------------------|-----|------|-------|----------|------|-------------------|-------|---|---|--------|---------------------------------------|--------------------------|
|                                                                                                                                             | from               | to   | %    | $\mu$ | $\sigma$ | m    | from                                           | to  | %    | $\mu$ | $\sigma$ | m    | A <sub>comb</sub> | A     | L | P |        |                                       | C                        |
| <a href="#">Show all</a><br><a href="#">Show structure</a><br>▼ D48A Myashkhi crypt                                                         | 1732               | ...  | 95.4 | 1781  | 98       | 1744 |                                                |     |      |       |          |      | 35.7              |       |   |   |        | <input checked="" type="checkbox"/> 2 | <input type="checkbox"/> |
| Warning! X-Test fails at 5% - D48A Myashkhi crypt X2-Test: df=1<br>T=4.228(5% 3.8)<br>Warning! Poor agreement - n=2 Acomb= 35.7%(An= 50.0%) |                    |      |      |       |          |      |                                                |     |      |       |          |      |                   |       |   |   |        |                                       |                          |
| #30 (240,20)                                                                                                                                | 1641               | 1948 | 95.4 | 1700  | 72       | 1660 | 1646                                           | ... | 95.4 | 1695  | 98       | 1658 |                   | 105.8 |   |   |        | <input checked="" type="checkbox"/> 3 | <input type="checkbox"/> |
| Warning! Date may extend out of range - 240+/-20BP                                                                                          |                    |      |      |       |          |      |                                                |     |      |       |          |      |                   |       |   |   |        |                                       |                          |
| #31 (220,25)                                                                                                                                | 1644               | ...  | 95.4 | 1752  | 93       | 1772 | 1732                                           | ... | 95.4 | 1781  | 98       | 1744 |                   | 22    |   |   |        | <input checked="" type="checkbox"/> 4 | <input type="checkbox"/> |
| Warning! Date may extend out of range - 220+/-25BP                                                                                          |                    |      |      |       |          |      | Warning! Poor agreement - A= 22.0%(A'c= 60.0%) |     |      |       |          |      |                   |       |   |   |        |                                       |                          |

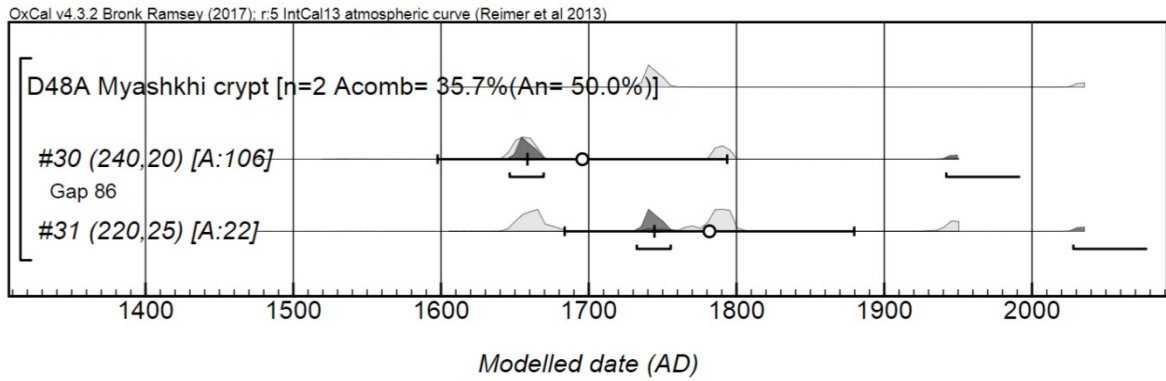

Figure S3 (continued).

e) D50A Thaba-Yerdy Christian Church

| Name                                | Unmodelled (BC/AD) |      |      |       |          |      | Modelled (BC/AD) |      |      |       |          |      | Indices           |       |   |   | Select | Page break                            |                          |
|-------------------------------------|--------------------|------|------|-------|----------|------|------------------|------|------|-------|----------|------|-------------------|-------|---|---|--------|---------------------------------------|--------------------------|
|                                     | from               | to   | %    | $\mu$ | $\sigma$ | m    | from             | to   | %    | $\mu$ | $\sigma$ | m    | A <sub>comb</sub> | A     | L | P |        |                                       | C                        |
| ▼ D50A Thaba-Yerdy Christian church | 1519               | 1550 | 95.4 | 1535  | 7        | 1536 |                  |      |      |       |          |      | 91.1              |       |   |   |        | <input checked="" type="checkbox"/> 2 | <input type="checkbox"/> |
| #12 (485,25)                        | 1411               | 1447 | 95.4 | 1429  | 10       | 1430 | 1409             | 1440 | 95.4 | 1425  | 7        | 1426 |                   | 100.7 |   |   |        | <input checked="" type="checkbox"/> 3 | <input type="checkbox"/> |
| #13 (371,24)                        | 1449               | 1631 | 95.4 | 1530  | 58       | 1508 | 1496             | 1527 | 95.4 | 1512  | 7        | 1513 |                   | 87.1  |   |   |        | <input checked="" type="checkbox"/> 4 | <input type="checkbox"/> |
| Outer                               |                    |      |      |       |          |      | 1519             | 1550 | 95.4 | 1535  | 7        | 1536 |                   |       |   |   |        | <input checked="" type="checkbox"/> 5 | <input type="checkbox"/> |

OxCal v4.3.2 Bronk Ramsey (2017); r:5 IntCal13 atmospheric curve (Reimer et al 2013)

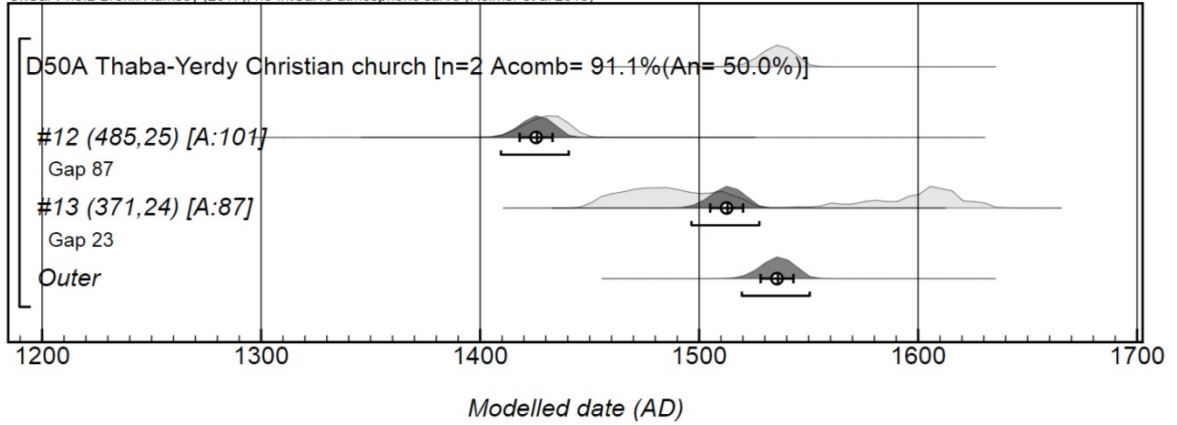

Figure S3 (continued).

f) D53A Tusholi sanctuary, Kog village

| Name                                  | Unmodelled (BC/AD) |      |      |       |          |      | Modelled (BC/AD) |      |      |       |          |      | Indices           |       |   |   | Select | Page break                          |   |                          |
|---------------------------------------|--------------------|------|------|-------|----------|------|------------------|------|------|-------|----------|------|-------------------|-------|---|---|--------|-------------------------------------|---|--------------------------|
|                                       | from               | to   | %    | $\mu$ | $\sigma$ | m    | from             | to   | %    | $\mu$ | $\sigma$ | m    | A <sub>comb</sub> | A     | L | P |        |                                     | C | All Visible              |
| ▼ D53A Tusholi sanctuary, Kog village | 1437               | 1482 | 95.4 | 1454  | 11       | 1453 |                  |      |      |       |          |      | 115               |       |   |   |        | <input checked="" type="checkbox"/> | 2 | <input type="checkbox"/> |
| #19 (621,22)                          | 1293               | 1398 | 95.4 | 1346  | 32       | 1352 | 1345             | 1390 | 95.4 | 1362  | 11       | 1361 |                   | 112   |   |   |        | <input checked="" type="checkbox"/> | 3 | <input type="checkbox"/> |
| #20 (422,22)                          | 1433               | 1607 | 95.4 | 1460  | 28       | 1454 | 1437             | 1482 | 95.4 | 1454  | 11       | 1453 |                   | 108.8 |   |   |        | <input checked="" type="checkbox"/> | 4 | <input type="checkbox"/> |

OxCal v4.3.2 Bronk Ramsey (2017); r5 IntCal13 atmospheric curve (Reimer et al 2013)

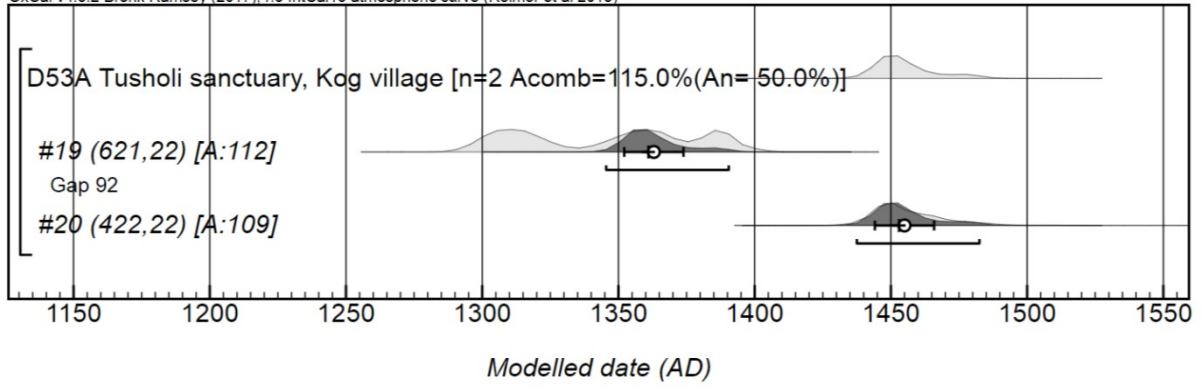

Figure S3 (continued).

g) D54A Albi-Yerdy Christian Church

| Name                                                                            | Unmodelled (BC/AD)                                                           |     |      |       |          |     | Modelled (BC/AD)                               |     |      |       |          |     | Indices           |      |   |   | Select | Page break                          |   |                          |
|---------------------------------------------------------------------------------|------------------------------------------------------------------------------|-----|------|-------|----------|-----|------------------------------------------------|-----|------|-------|----------|-----|-------------------|------|---|---|--------|-------------------------------------|---|--------------------------|
|                                                                                 | from                                                                         | to  | %    | $\mu$ | $\sigma$ | m   | from                                           | to  | %    | $\mu$ | $\sigma$ | m   | A <sub>comb</sub> | A    | L | P |        |                                     | C | All Visible              |
| <a href="#">Show all</a><br><a href="#">Show structure</a><br>▼ D54A Albi-Yerdy | 840                                                                          | 881 | 95.4 | 864   | 11       | 866 |                                                |     |      |       |          |     | 3.9               |      |   |   |        | <input checked="" type="checkbox"/> | 2 | <input type="checkbox"/> |
|                                                                                 | Warning! X-Test fails at 5% - D54A Albi-Yerdy X2-Test: df=3 T=15.327(5% 7.8) |     |      |       |          |     |                                                |     |      |       |          |     |                   |      |   |   |        |                                     |   |                          |
|                                                                                 | Warning! Poor agreement - n=4 Acomb= 3.9%(An= 35.4%)                         |     |      |       |          |     |                                                |     |      |       |          |     |                   |      |   |   |        |                                     |   |                          |
| #15 (1197,23)                                                                   | 769                                                                          | 890 | 95.4 | 827   | 39       | 828 | 699                                            | 740 | 95.4 | 723   | 11       | 725 |                   | 12   |   |   |        | <input checked="" type="checkbox"/> | 3 | <input type="checkbox"/> |
|                                                                                 |                                                                              |     |      |       |          |     | Warning! Poor agreement - A= 12.0%(A'c= 60.0%) |     |      |       |          |     |                   |      |   |   |        |                                     |   |                          |
| #16 (1145,28)                                                                   | 776                                                                          | 975 | 95.4 | 894   | 55       | 901 | 782                                            | 823 | 95.4 | 806   | 11       | 808 |                   | 45.5 |   |   |        | <input checked="" type="checkbox"/> | 4 | <input type="checkbox"/> |
|                                                                                 |                                                                              |     |      |       |          |     | Warning! Poor agreement - A= 45.5%(A'c= 60.0%) |     |      |       |          |     |                   |      |   |   |        |                                     |   |                          |
| #32 (1260,20)                                                                   | 677                                                                          | 775 | 95.4 | 730   | 31       | 727 | 833                                            | 874 | 95.4 | 857   | 11       | 859 |                   | 3.3  |   |   |        | <input checked="" type="checkbox"/> | 5 | <input type="checkbox"/> |
|                                                                                 |                                                                              |     |      |       |          |     | Warning! Poor agreement - A= 3.3%(A'c= 60.0%)  |     |      |       |          |     |                   |      |   |   |        |                                     |   |                          |
| #17 (1224,22)                                                                   | 695                                                                          | 883 | 95.4 | 797   | 51       | 801 | 840                                            | 881 | 95.4 | 864   | 11       | 866 |                   | 85.6 |   |   |        | <input checked="" type="checkbox"/> | 6 | <input type="checkbox"/> |

OxCal v4.3.2 Bronk Ramsey (2017); r5 IntCal13 atmospheric curve (Reimer et al 2013)

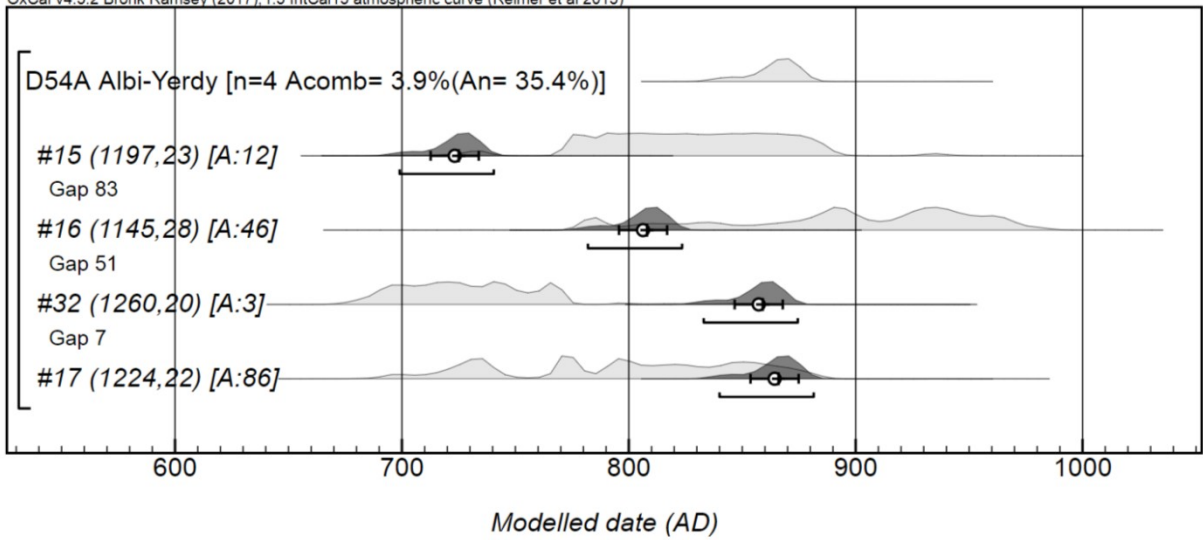

Figure S3 (continued).

h) D65A Semi-battle tower, Khamkhi village

| Name                                               | Unmodelled (BC/AD) |      |      |       |          |      | Modelled (BC/AD) |      |      |       |          |      | Indices           |       |   |   | Select | Page break                          |   |                          |
|----------------------------------------------------|--------------------|------|------|-------|----------|------|------------------|------|------|-------|----------|------|-------------------|-------|---|---|--------|-------------------------------------|---|--------------------------|
|                                                    | from               | to   | %    | $\mu$ | $\sigma$ | m    | from             | to   | %    | $\mu$ | $\sigma$ | m    | A <sub>comb</sub> | A     | L | P |        |                                     | C | All Visible              |
| ▼ D65A Semi-battle tower, Khamkhi village          | 1649               | 1681 | 95.4 | 1665  | 8        | 1665 |                  |      |      |       |          |      | 102.3             |       |   |   |        | <input checked="" type="checkbox"/> | 2 | <input type="checkbox"/> |
| #33 (340,20)                                       | 1474               | 1635 | 95.4 | 1559  | 48       | 1567 | 1567             | 1599 | 95.4 | 1583  | 8        | 1583 |                   | 120.2 |   |   |        | <input checked="" type="checkbox"/> | 3 | <input type="checkbox"/> |
| #34 (210,20)                                       | 1648               | ...  | 95.3 | 1770  | 93       | 1783 | 1649             | 1681 | 95.4 | 1665  | 8        | 1665 |                   | 85.9  |   |   |        | <input checked="" type="checkbox"/> | 4 | <input type="checkbox"/> |
| Warning! Date may extend out of range - 210+/-20BP |                    |      |      |       |          |      |                  |      |      |       |          |      |                   |       |   |   |        |                                     |   |                          |

OxCal v4.3.2 Bronk Ramsey (2017); r:5 IntCal13 atmospheric curve (Reimer et al 2013)

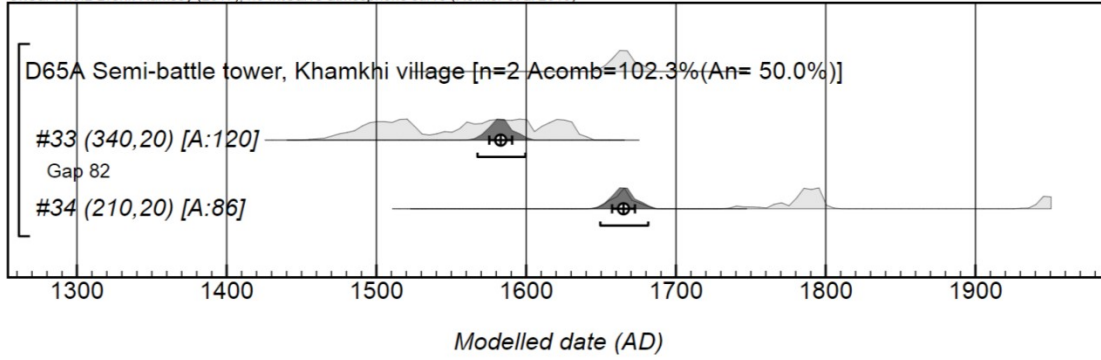

Figure S3 (continued).

i) D66A Crypt near Khamkhi village

| Name                              | Unmodelled (BC/AD) |      |      |       |            | Modelled (BC/AD) |      |      |       |            | Indices           |       |   |       | Select | Page break                            |                          |
|-----------------------------------|--------------------|------|------|-------|------------|------------------|------|------|-------|------------|-------------------|-------|---|-------|--------|---------------------------------------|--------------------------|
|                                   | from               | to   | %    | $\mu$ | $\sigma$ m | from             | to   | %    | $\mu$ | $\sigma$ m | A <sub>comb</sub> | A     | L | P     |        |                                       | C                        |
| ▼ D66A Crypt near Khamkhi village | 1571               | 1638 | 95.4 | 1610  | 16         | 1612             |      |      |       |            |                   | 115.6 |   |       |        | <input checked="" type="checkbox"/> 2 | <input type="checkbox"/> |
| #21 (304,22)                      | 1497               | 1649 | 95.4 | 1571  | 43         | 1560             | 1497 | 1564 | 95.4  | 1536       | 16                | 1538  |   | 113.1 |        | <input checked="" type="checkbox"/> 3 | <input type="checkbox"/> |
| #22 (346,22)                      | 1466               | 1635 | 95.4 | 1554  | 51         | 1563             | 1571 | 1638 | 95.4  | 1610       | 16                | 1612  |   | 108.6 |        | <input checked="" type="checkbox"/> 4 | <input type="checkbox"/> |

OxCal v4.3.2 Bronk Ramsey (2017); r:5 IntCal13 atmospheric curve (Reimer et al 2013)

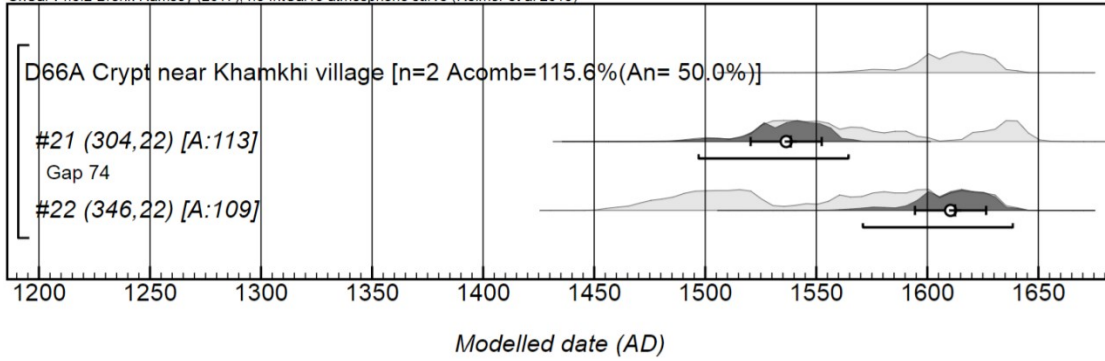

Figure S3 (continued).

j) D71A Tumgoi sanctuary

| Name                    | Unmodelled (BC/AD) |      |      |       |            | Modelled (BC/AD) |      |      |       |            | Indices           |       |   |   | Select | Page break |                                       |                          |
|-------------------------|--------------------|------|------|-------|------------|------------------|------|------|-------|------------|-------------------|-------|---|---|--------|------------|---------------------------------------|--------------------------|
|                         | from               | to   | %    | $\mu$ | $\sigma$ m | from             | to   | %    | $\mu$ | $\sigma$ m | A <sub>comb</sub> | A     | L | P |        |            | C                                     | All Visible              |
| ▼ D71A Tumgoi sanctuary | 1558               | 1637 | 95.4 | 1602  | 20         | 1602             |      |      |       |            |                   | 112.9 |   |   |        |            | <input checked="" type="checkbox"/> 2 | <input type="checkbox"/> |
| #23 (311,22)            | 1494               | 1646 | 95.4 | 1568  | 42         | 1562             | 1496 | 1575 | 95.4  | 1540       | 20                | 1540  |   |   |        |            | <input checked="" type="checkbox"/> 3 | <input type="checkbox"/> |
| #24 (343,22)            | 1470               | 1635 | 95.4 | 1556  | 50         | 1564             | 1558 | 1637 | 95.4  | 1602       | 20                | 1602  |   |   |        |            | <input checked="" type="checkbox"/> 4 | <input type="checkbox"/> |

OxCal v4.3.2 Bronk Ramsey (2017); r5 IntCal13 atmospheric curve (Reimer et al 2013)

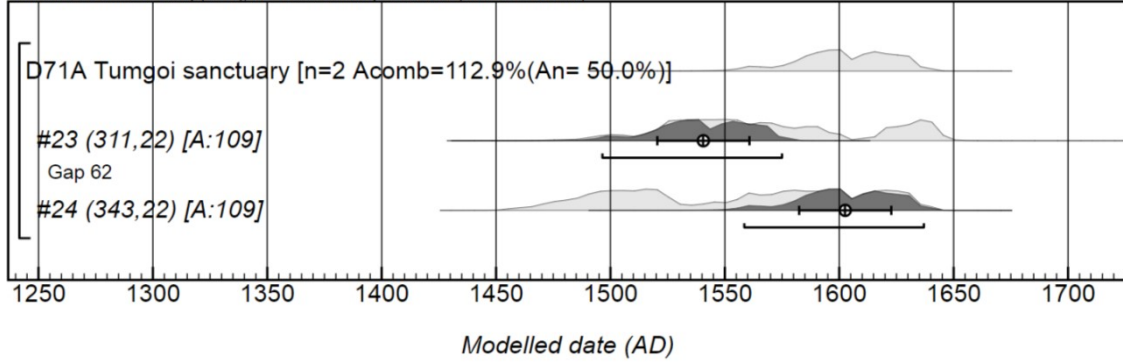

Supplement: Supplementary file 1 [file S003382221900033Xsupp001.pdf]
